# Supplementary material
Source: PubMed Central journal article supplement (PMC5579377)
Supplement: EMBJ-36-2567-s001.pdf [file EMBJ-36-2567-s001.pdf]

## Appendix

### Table of contents

#### Appendix Supplementary Figures and Legends

- Appendix Figure S1
- Appendix Figure S2
- Appendix Figure S3
- Appendix Figure S4
- Appendix Figure S5
- ~~Appendix~~ Appendix Figure S6
- Appendix Figure S7

Code for the stochastic simulations of *Shigella*-induced  $\text{Ca}^{2+}$  responses

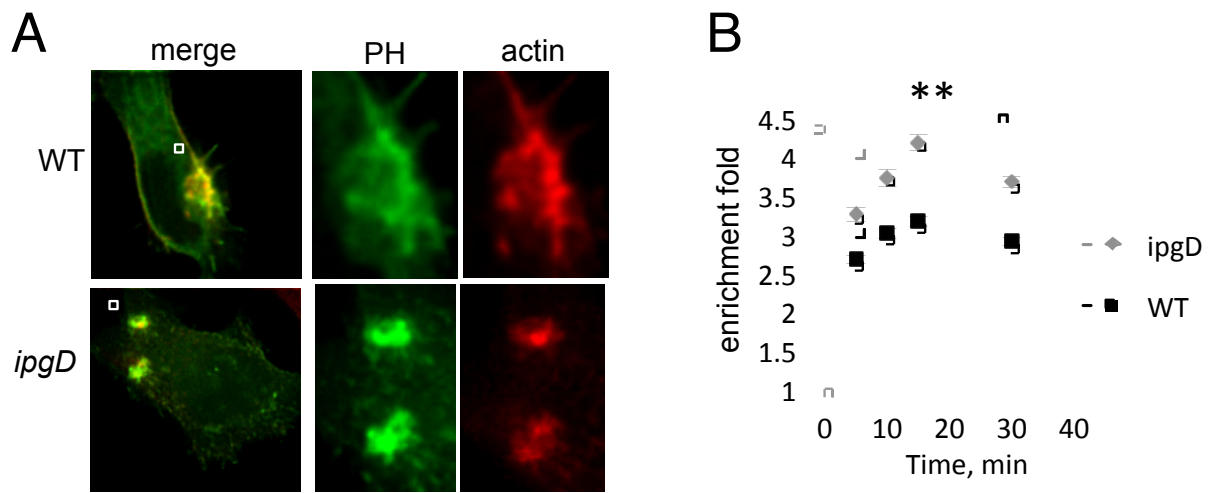

**Appendix Fig S1. IpgD down-regulates PI(4,5)P<sub>2</sub> levels at *Shigella* invasion sites.**

**A** Representative confocal fluorescence images of cells transfected with the GFP-PH<sub>PLC $\delta$</sub>  probe, challenged with the indicated bacterial strains for 15 min at 37°C and processed for fluorescence staining. Red: actin; green: GFP-PH<sub>PLC $\delta$</sub> . Scale bar = 5  $\mu$ m.

**B** The enrichment fold of PI(4,5)P<sub>2</sub> at invasion foci  $\pm$  SEM was determined from the levels of the GFP-PH<sub>PLC $\delta$</sub>  probe at the indicated time points (Materials and Methods). WT *Shigella*: black squares bars; *ipgD* mutant: empty diamonds. N = 3, > 30 foci per sample. Wilcoxon sum rank test, \*\*: p < 0.01

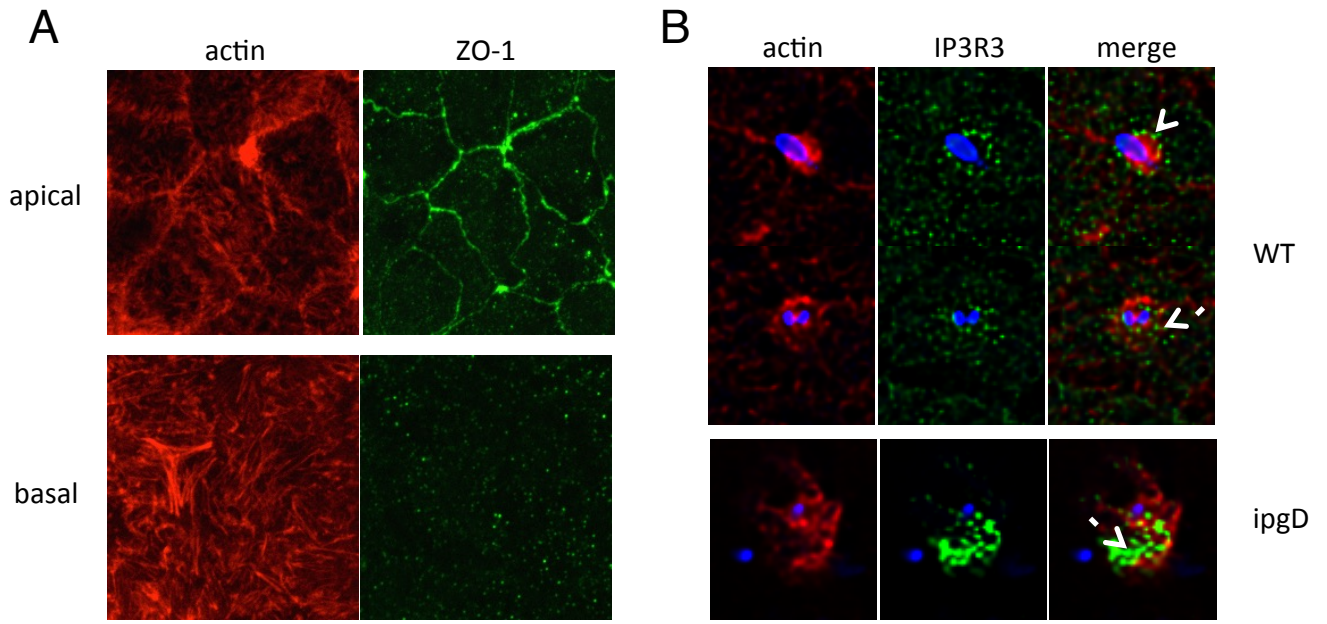

**Appendix Fig S2. IpgD down-regulates the recruitment of IP3R3 at invasion sites in polarized intestinal epithelial cells.**

Representative confocal fluorescence micrographs of polarized TC7 cells fixed and processed for immunofluorescence staining.

- A** Projection of confocal planes corresponding to the apical or basal surfaces of the same field. Red: actin; Green: ZO-1. Scale bar = 5  $\mu$ m.
- B** TC-7 cells were challenged with the indicated bacterial strains for 20 min at 37°C and processed for immunofluorescence staining. Green: IP3R3; red: actin; blue: bacterial LPS. Scale bar = 5  $\mu$ m. IP3R3-containing granules are detected entrapped (arrows) in- or surrounding (arrowhead) actin foci.

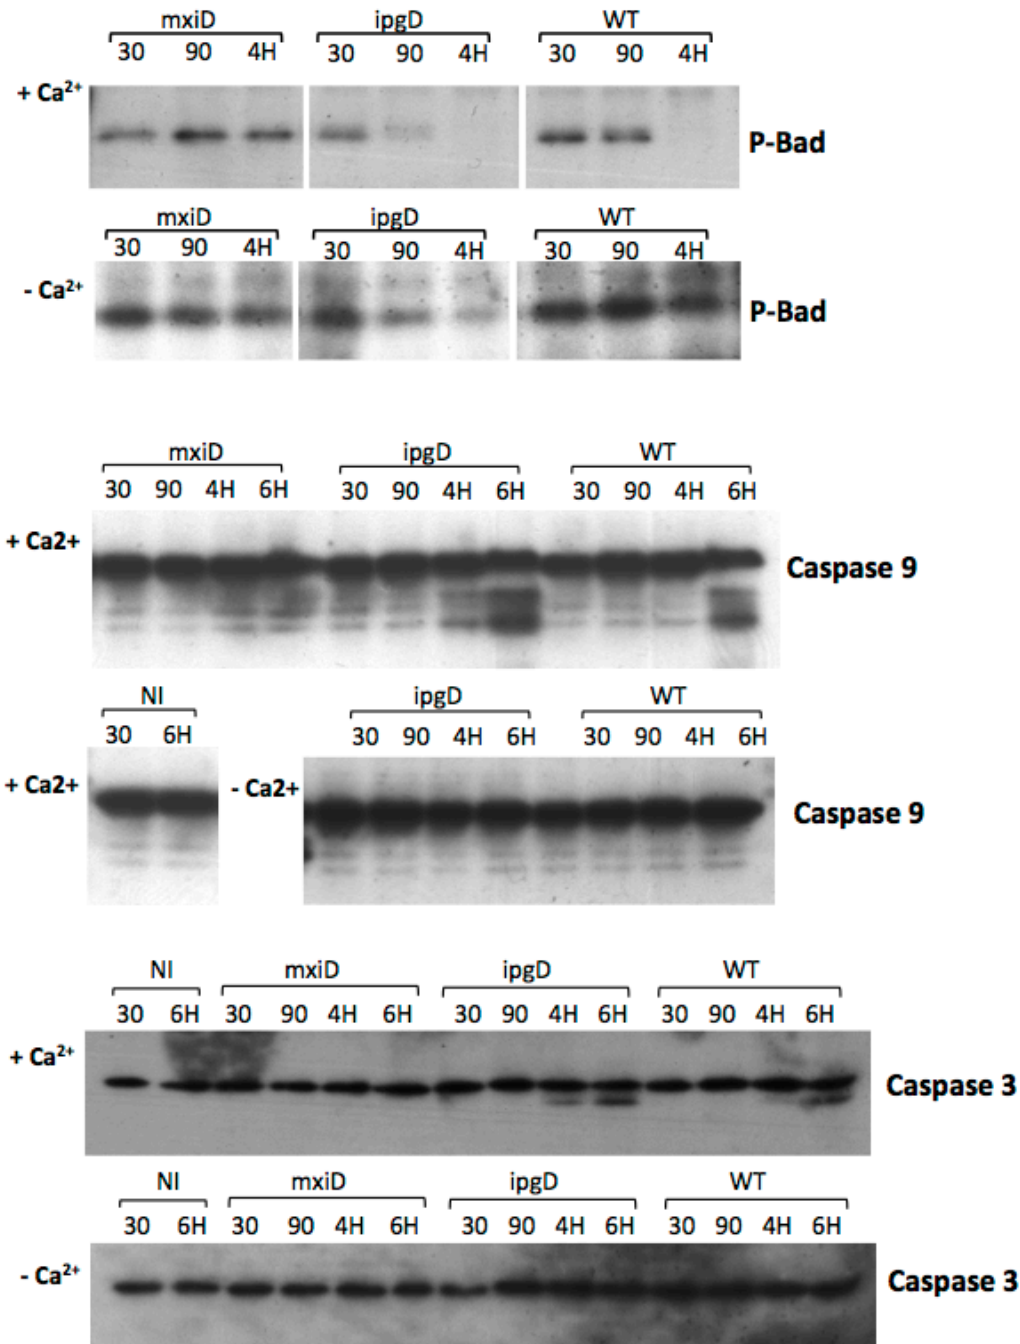

**Appendix Fig S3. Effects of IpgD on the Ca<sup>2+</sup>-independent phosphorylation of BAD and Ca<sup>2+</sup>-dependent degradation of caspases 9 and 3.**

Cells were challenged with the indicated bacterial strains. At indicated times, cells were scraped and lysates were analysed by anti-phospho-BAD, -caspase 9, or -caspase 3, Western blotting. Cells were incubated in buffer in the presence (+Ca<sup>2+</sup>) or absence of 2 mM EGTA (-Ca<sup>2+</sup>).

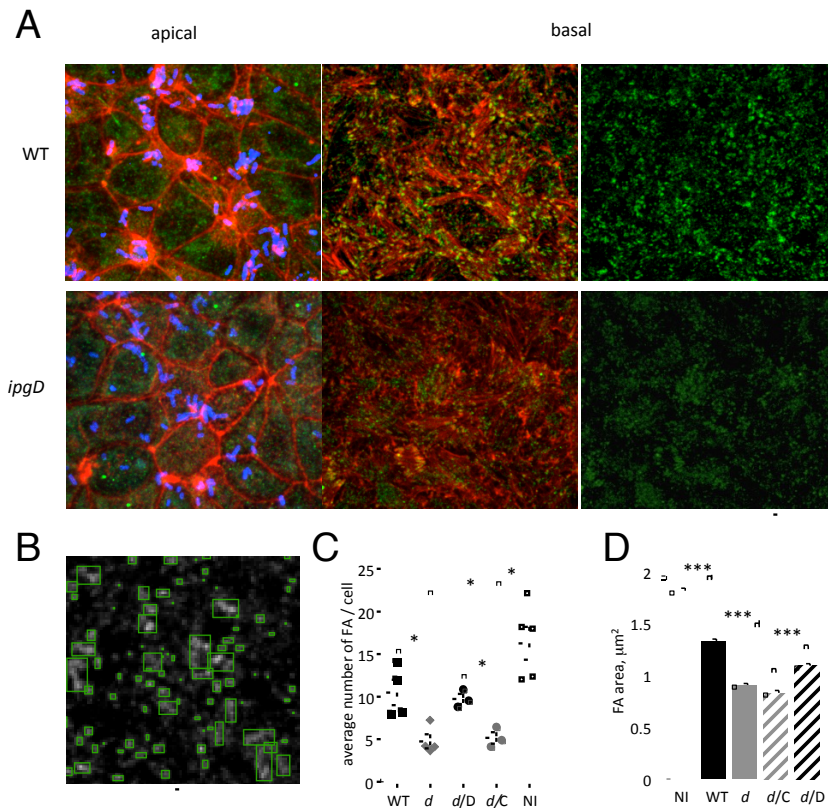

**Appendix Fig S4. IpgD delays FA disassembly during *Shigella* invasion of polarized intestinal epithelial TC-7 cells.**

Polarized TC-7 cells were challenged with the indicated bacterial strains for 90 min. Samples were fixed and processed for immuno-fluorescence staining. Red: actin; green: talin; blue: bacterial LPS. Scale bar = 5  $\mu\text{m}$ .

**A** Representative confocal micrographs of the apical or basal regions of the same field, with a Z-interspacing of 11  $\mu\text{m}$ . Note that at this time point, while bacteria were mainly detected at the cell apical region, different effects on FAs were observed in the cell basal region.

**B** Talin-containing FAs were scored using an automated algorithm (Materials and Methods). Scored FAs are detected in green boxes in the representative image. The FA average size was determined for NI: non-infected cells, or cells infected with WT: wild-type *Shigella*; *d*: *ipgD* mutant; *d/C*: *ipgD*/IpgDC438S; *d/D*: *ipgD*/IpgD

**C** The average number of FAs / cell  $\pm$  SEM was determined for cells infected with the indicated bacteria as in B. Each value corresponds to a determination in a distinct field. For each sample, N = 2, > 50 cells, > 3500 FAs. Mann-Whitney test, \*: p value for: WT vs *ipgD* = 0.0143; *d/D* vs *d/C* = 0.05; *ipgD* vs NI = 0.0079  $\leq$  0.005; *d/C* vs NI = 0.0179.

**D** The average cell area  $\pm$  SEM was determined for cells infected with the indicated bacteria as in B. One-way Anova test, N = 2, > 30 cells. \*\*\*: p < 0.001

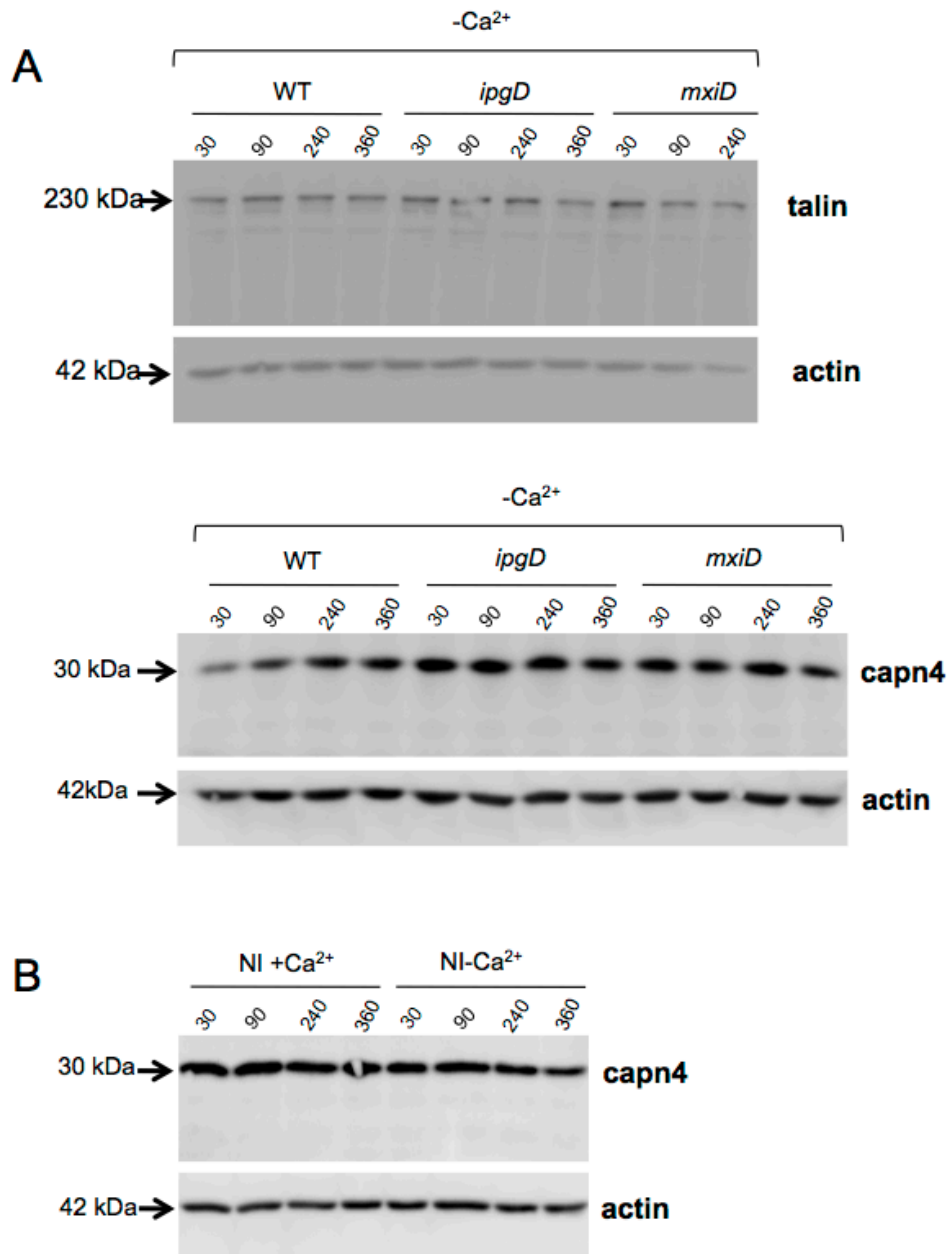

**Appendix Figure S5. Talin degradation and calpain activation are inhibited in the absence of extracellular Ca<sup>2+</sup> during bacterial infection.**

- A** Cells were challenged with the indicated bacterial strains for the time indicated in minutes in the presence of 2 mM EGTA (-Ca<sup>2+</sup>). At indicated times, cells were scraped and lysates were analysed by anti-talin or anti-capn4 Western blotting.
- B** Anti-capn4 Western-blotting analysis of non-infected (NI) control cells incubated for the time indicated in minutes in the presence (+Ca<sup>2+</sup>) or absence of 2 mM EGTA (-Ca<sup>2+</sup>).

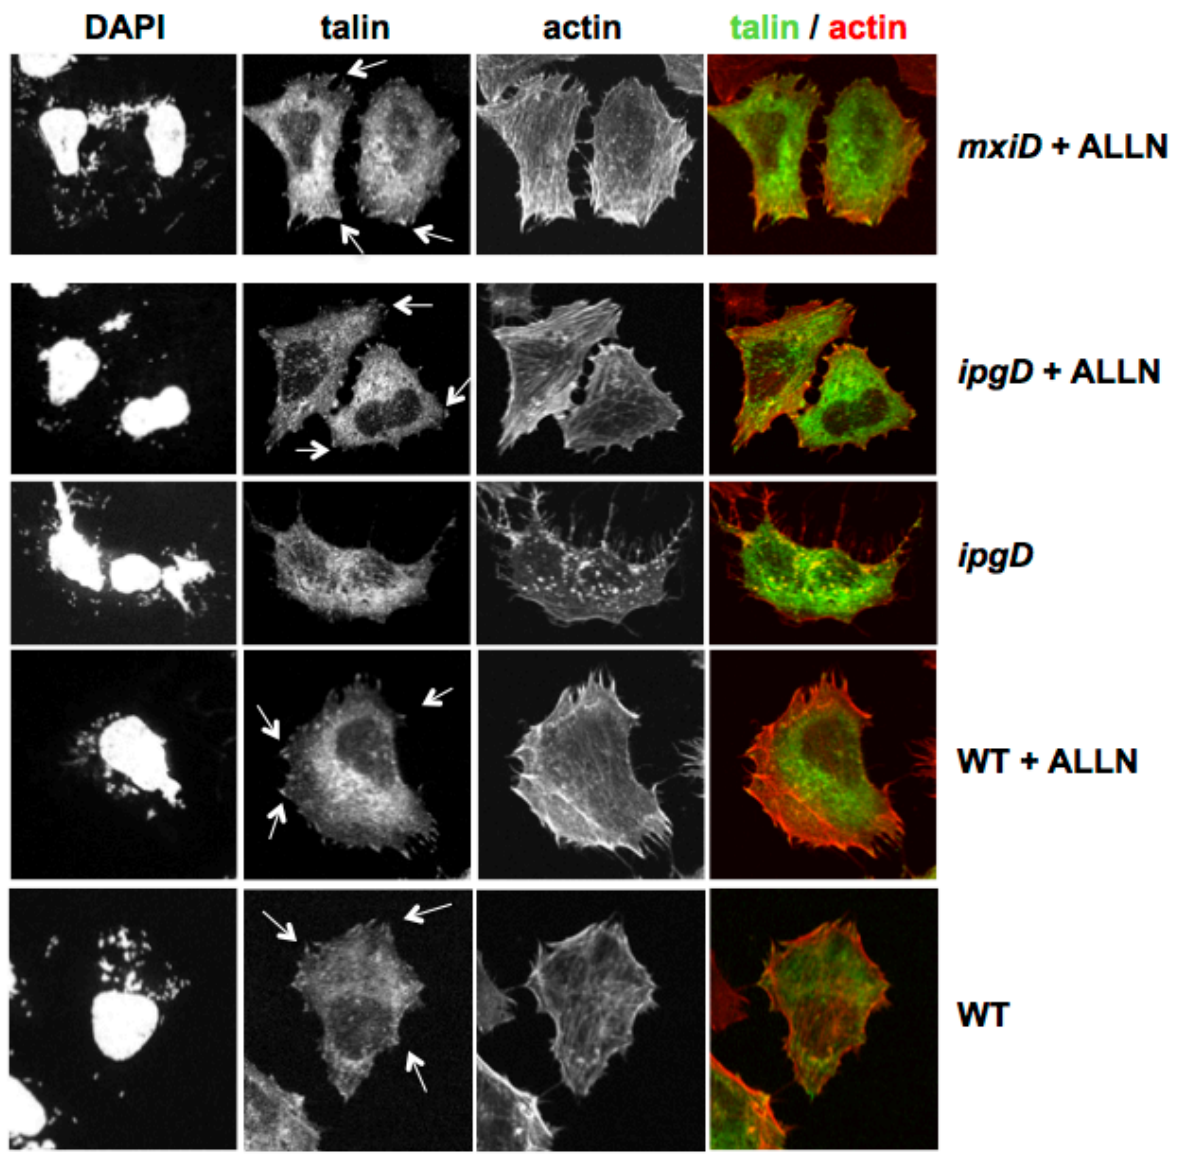

**Appendix Figure S6. The calpain inhibitor ALLN prevents FA disassembly during *Shigella* infection.**

Talin-GFP transfected cells were pre-incubated with the calpain inhibitor ALLN at a final concentration of 10  $\mu$ M for 60 min prior to challenge with bacteria for 30 min at 37°C and an additional 60 min in the presence of gentamicin at a final concentration of 50  $\mu$ g/ml. Samples were fixed and processed for immunofluorescence staining of DNA (DAPI) and actin. Representative micrographs of cells challenged with the indicated bacterial strains. The arrows point to FAs. Scale bar, 5  $\mu$ m.

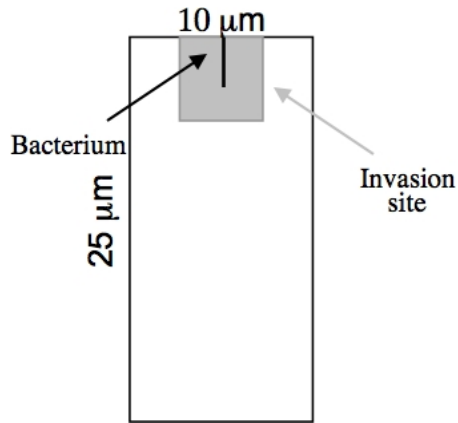

|             | $D_{\text{Focus}}/D_{\text{Cyto}}$ | $J_{\text{IP}}/V_{\text{b}}$ |
|-------------|------------------------------------|------------------------------|
| <i>WT</i>   | 0.62                               | 12.50                        |
| <i>ipgD</i> | 0.77                               | 16.25                        |

**Appendix Figure S7. Geometry and parameters used in the simulations of  $\text{Ca}^{2+}$  responses induced by *Shigella* during cell invasion.**

The cell is simulated as a 2-dimensional 26 x 10  $\mu\text{m}$  system. The *Shigella* invasion focus corresponds to the 6 x 6  $\mu\text{m}$  top central region (grey square). The bacterium is schematized as the black rod. The ratios of the diffusion coefficients of  $\text{InsP}_3$  and of  $\text{Ca}^{2+}$  in the focus and in the cytosol ( $D_{\text{Focus}}/D_{\text{Cyto}}$ ) and of the rates of  $\text{InsP}_3$  synthesis at the invasion site relative to the rest of the cell ( $J_{\text{IP}}/V_{\text{b}}$ ) are indicated in the Table.  $\text{Ca}^{2+}$  responses are considered as global if the peak  $\text{Ca}^{2+}$  concentration in the middle of the cell exceeds the third of the peak  $\text{Ca}^{2+}$  response at the invasion site.



## Stochastic simulations of *Shigella*-induced Ca<sup>2+</sup> responses

```
#include <iostream>

#include <math.h>

#include <cmath>

#include <stdio.h>

#include <stdlib.h>

#include <time.h>

#include <vector>

#include <fstream>

using namespace std;

int main()

{

srand(time(0));

////////////////////////////////////

//////Parameters for Ca2+ dynamics////

////////////////////////////////////

double const alpha(0.05), kplus(0.1822), kmoins(0.005),

kact(0.4),ni(3),na(2),b(0.007),vmp(1.2),kp(0.35),k(1),kdeg(0.1),vip(0.1);

////////////////////////////////////

//////Size of the system////

////////////////////////////////////

int const N1(13),N2(5),NN(N1*N2);
```

```
double const omega(10000/(N1*N2)),Rtot(6000/(N1*N2));
```

```
////////////////////////////////////
```

```
/////Some parameters are not homogeneous in the whole cell/////
```

```
////////////////////////////////////
```

```
double jip[NN];
```

```
for(int i(0);i<NN;i++)
```

```
{
```

```
    jip[i]=0;
```

```
}
```

```
jip[N1]=1.25;
```

```
jip[N1+1]=1.25;
```

```
jip[N1+2]=1.25;
```

```
jip[2*N1+1]=1.25;
```

```
jip[2*N1+2]=1.25;
```

```
jip[2*N1]=1.25;
```

```
jip[3*N1]=1.25;
```

```
jip[3*N1+2]=1.25;
```

```
jip[3*N1+1]=1.25;
```

```
double k1[NN];
```

```
for(int i(0);i<NN;i++)
```

```

{
    k1[i]=35;
}

k1[N1]=60;
k1[N1+2]=60;
k1[N1+1]=60;
k1[2*N1+1]=60;
k1[2*N1+2]=60;
k1[2*N1]=60;
k1[3*N1+1]=60;
k1[3*N1+2]=60;
k1[3*N1]=60;

double Di[NN];

for(int i(0);i<NN;i++)
{
    Di[i]=280/4;
}

Di[N1+1]=175/4;
Di[N1+2]=175/4;
Di[N1]=175/4;
Di[2*N1+1]=175/4;
Di[2*N1+2]=175/4;
Di[2*N1]=175/4;
Di[3*N1+1]=175/4;
Di[3*N1+2]=175/4;

```

```

Di[3*N1]=175/4;
double D[NN];
for(int i(0);i<NN;i++)
{
    D[i]=30/4;
}
D[N1+1]=19/4;
D[N1+2]=19/4;
D[N1]=19/4;
D[2*N1+1]=19/4;
D[2*N1+2]=19/4;
D[2*N1]=19/4;
D[3*N1+1]=19/4;
D[3*N1+2]=19/4;
D[3*N1]=19/4;

////////////////////////////////////
////Initial Conditions////
////////////////////////////////////

double I0(round(1.6*omega));
double I[NN];
for(int i(0);i<NN;i++)
{
    I[i]=I0;
}

```

```

}
double C0(round(0.064153*omega));
double C[NN];
for(int i(0);i<NN;i++)
{
    C[i]=C0;
}
double R0(round(0.0092926*Rtot));
double R[NN];
for(int i(0);i<NN;i++)
{
    R[i]=R0;
}

////////////////////////////////////
////Parameters for Gillespie's algorithm////
////////////////////////////////////

double const trans(0),tend(800),tech(0.1);
double t(0),told(0);
double w[NN*15];
for(int i(0);i<NN*15;i++)
{

```

```

    w[i]=0;
}

string V("test2.dat");
ofstream myfile;
myfile.open (V.c_str());

double IR[NN];

//////////
//////Gillespie's algorithm//////
//////////

while (t<tend+trans)
{
//////////
//////Calculing propensities//////
//////////

    for(int i(0); i<NN;i++)
    {

        IR[i]=(Rtot-
R[i])*(I[i]/(I[i]+k*omega))*pow(C[i],na)/(pow(C[i],na)+pow((kact*omega),na));

```

```

w[i]=alpha*b*(k1[i]*omega);
w[i+NN*1]=alpha*(k1[i]*omega)*IR[i]/Rtot;
w[i+NN*2]=vmp*omega*pow(C[i],2)/(pow(C[i],2)+pow(kp*omega,2));
w[i+NN*3]=kmoins*R[i];

w[i+NN*4]=(kplus/pow(omega,3))*pow(C[i],ni)*(Rtot-
R[i])*pow(kact*omega,na)/(pow(C[i],na)+pow(kact*omega,na));
w[i+NN*5]=0;
w[i+NN*6]=0;
w[i+NN*7]=0;
w[i+NN*8]=0;
w[i+NN*11]=0;
w[i+NN*12]=0;
w[i+NN*13]=0;
w[i+NN*14]=0;
w[i+NN*9]=jip[i]*omega+vip*omega;
w[i+NN*10]=kdeg*I[i];
}
for (int i(0);i<N1*(N2-1);i++)
{
if (I[i+N1]<I[i])
w[i+NN*13]=D[i]*(I[i]-I[i+N1]);
if (C[i+N1]<C[i])
w[i+NN*7]=D[i]*(C[i]-C[i+N1]);
if (I[i]<I[i+N1])
w[i+N1+NN*14]=D[i+N1]*(I[i+N1]-I[i]);
}

```

```

    if (C[i]<C[i+N1])
        w[i+N1+NN*8]=D[i+N1]*(C[i+N1]-C[i]);
    }
for (int i(0);i<N1-1;i++)
    {
    for (int j(0); j<N2;j++)
        {
        if (I[N1*(j)+i]< I[N1*(j)+i+1])
            {
            w[N1*(j)+i+1+NN*11]=D[i+1]*(I[N1*(j)+i+1]-I[N1*(j)+i]);
            }

        if (C[N1*(j)+i]< C[N1*(j)+i+1])
            {
            w[N1*(j)+i+1+NN*5]=D[i+1]*(C[N1*(j)+i+1]-C[N1*(j)+i]);
            }

        if (I[N1*(j)+i+1]< I[N1*(j)+i])
            {
            w[N1*(j)+i+NN*12]=D[i]*(I[N1*(j)+i]-I[N1*(j)+i+1]);
            }

        if (C[N1*(j)+i+1]< C[N1*(j)+i])
            {
            w[N1*(j)+i+NN*6]=D[i]*(C[N1*(j)+i]-C[N1*(j)+i+1]);
            }
    }

```



```

    }
}
////////////////////////////////////
////Choosing which reaction occurs////
////////////////////////////////////
for (int i(1);i<NN*15;i++)
{
    w[i]=w[i-1]+w[i];
}
double ct(0),z1(0),z2(0),tau(0),uct(0);
int bip(1);
ct=w[NN*15-1];
z1=(rand()/(double)RAND_MAX)+0.0000001 ;
z2=rand()/(double)RAND_MAX;
tau=(-log(z1))/ct;
t=t+tau;
uct=z2*ct;
bip=0;

if (uct<w[NN-1])
{
    while (uct>w[bip])
    {
        bip=bip+1;
    }
}

```

```

    C[bip]=C[bip]+1;
}
else if (uct<w[2*NN-1])
{
    while (uct>w[NN+bip])
    {
        bip=bip+1;
    }
    C[bip]=C[bip]+1;
}
else if (uct<w[3*NN-1])
{
    while (uct>w[NN*2+bip])
    {
        bip=bip+1;
    }
    C[bip]=C[bip]-1;
}
else if (uct<w[4*NN-1])
{
    while (uct>w[NN*3+bip])
    {
        bip=bip+1;
    }
    R[bip]=R[bip]-1;
}

```

```

}
else if (uct<w[5*NN-1])
{
    while (uct>w[NN*4+bip])
    {
        bip=bip+1;
    }
    R[bip]=R[bip]+1;
}
else if (uct<w[6*NN-1])
{
    while (uct>w[NN*5+bip])
    {
        bip=bip+1;
    }
    C[bip]=C[bip]-1;
    C[bip-1]=C[bip-1]+1;
}
else if (uct<w[7*NN-1])
{
    while (uct>w[NN*6+bip])
    {
        bip=bip+1;
    }
    C[bip]=C[bip]-1;
}

```

```

    C[bip+1]=C[bip+1]+1;
}
else if (uct<w[8*NN-1])
{
    while (uct>w[NN*7+bip])
    {
        bip=bip+1;
    }
    C[bip]=C[bip]-1;
    C[bip+N1]=C[bip+N1]+1;
}
else if (uct<w[9*NN-1])
{
    while (uct>w[NN*8+bip])
    {
        bip=bip+1;
    }
    C[bip]=C[bip]-1;
    C[bip-N1]=C[bip-N1]+1;
}
else if (uct<w[10*NN-1])
{
    while (uct>w[NN*9+bip])
    {
        bip=bip+1;

```

```

    }
    I[bip]=I[bip]+1;
}
else if (uct<w[11*NN-1])
{
    while (uct>w[NN*10+bip])
    {
        bip=bip+1;
    }
    I[bip]=I[bip]-1;
}
else if (uct<w[12*NN-1])
{
    while (uct>w[NN*11+bip])
    {
        bip=bip+1;
    }
    I[bip]=I[bip]-1;
    I[bip-1]=I[bip-1]+1;
}
else if (uct<w[13*NN-1])
{
    while (uct>w[NN*12+bip])
    {
        bip=bip+1;

```

```

    }
    I[bip]=I[bip]-1;
    I[bip+1]=I[bip+1]+1;
}
else if (uct<w[14*NN-1])
{
    while (uct>w[NN*13+bip])
    {
        bip=bip+1;
    }
    I[bip]=I[bip]-1;
    I[bip+N1]=I[bip+N1]+1;
}
else
{
    while (uct>w[NN*14+bip])
    {
        bip=bip+1;
    }
    I[bip]=I[bip]-1;
    I[bip-N1]=I[bip-N1]+1;
}

//////////
//////Saving data////

```

```
////////////////////////////////
```

```
if (t>told+tech)
{

    told=t;

    myfile << t << "\t";
    for (int i(0);i<NN;i++)
    {
        myfile << C[i] << "\t";
    }
    for (int i(0);i<NN;i++)
    {
        myfile << R[i] << "\t";
    }
    for (int i(0);i<NN;i++)
    {
        myfile << I[i] << "\t";
    }
    myfile << "\n";
}

myfile.close();
}

return 0;
}
```
